# Supplementary material for: Orderly assembly underpinning built-in asymmetry in the yeast centrosome duplication cycle requires cyclin-dependent kinase
Source: eLife. 2020 Aug 27;9:e59222. doi: 10.7554/eLife.59222 (PMC7470843; doi:10.7554/eLife.59222)
Supplement: Supplementary file 1. [file elife-59222-supp1.xlsx]

## Sheet: Sheet1
Table 1. Yeast strains used in this study
Strain	Background	Relevant Genotype	Figure
SLJ9614	W303	MATa tub4::TUB4-mT2-URA3MX spc110::YFP-SPC110 TRP1 ADE2 LYS2 ura3-1 his3-11,15 leu2-3,112 can1-100	1-fig sup 2 A
SLJ9617	W303	MATa tub4::TUB4-mT2-URA3MX spc72::YFP-SPC72 TRP1 ADE2 LYS2 ura3-1 his3-11,15 leu2-3,112 can1-100	1-fig sup 2 A
SLJ9387	W303	MATa tub4::TUB4-mT2-URA3MX spc110::SPC110-YFP-HIS3MX trp1-1 ADE2 LYS2 ura3-1 his3-11,15 leu2-3,112 can1-100	1-fig sup 2 B
SLJ9446	W303	MATa spc98::SPC98-mT2-URAMX spc110::SPC110-YFP-HIS3MX TRP1 ADE2 lys2∆ ura3-1 his3-11,15 leu2-3,112 can1-100	1-fig sup 2 B
SLJ10239	W303	MATa spc97::SPC97-mT2-URAMX spc110::SPC110-YFP-HIS3MX trp1-1 ADE2 lys2∆ ura3-1 his3-11,15 leu2-3,112 can1-100	1-fig sup 2B
SLJ9010	W303	MATa tub4::TUB4-mT2-URAMX TRP1 ADE2 lys2∆ ura3-1 his3-11,15 leu2-3,112 can1-100	1-fig sup 2C
SLJ9420	W303	MATa/MATα tub4::TUB4-mT2-URAMX/tub4::TUB4-mT2-URAMX TRP1/trp1-1 ADE2/ADE2 lys2∆/LYS2 ura3-1/ura3-1 his3-11,15/his3-11,15 leu2-3,112/leu2-3,112 can1-100/can1-100	1-fig sup 2C
KC34	15Dau	MATa spc72::SPC72-Venus-LEU2 tub4::TUB4-mT2-TRP1 ade1 his2 leu2-3,112 trp1-1a ura3Dns arg4	1B-F
KC36	15Dau	MATa kar1Δ15:HIS2 spc72::SPC72-Venus-LEU2 tub4::TUB4-mT2-TRP1 ade1 his2 leu2-3,112 trp1-1a ura3Dns arg4	1E-F
KC2035	15Dau	MATa tub4::TUB4-Venus-TRP1 spc110::mT2-SPC110-URA3 ade1 his2 leu2-3,112 trp1-1a ura3Dns arg4	2A
KC50	15Dau	MATa tub4::TUB4-Venus:TRP1 spc42::SPC42-mT2-LEU2 ade1 his2 leu2-3,112 trp1-1a ura3Dns arg4	2B, 2-fig sup 1A-B; 2-fig sup 3A
KC52	15Dau	MATa kar1Δ15:HIS2 tub4::TUB4-Venus-TRP1 spc42::SPC42-mT2-LEU2 ade1 his2 leu2-3,112 trp1-1a ura3Dns arg4	2B, 2-fig sup 1A-B
KC18	15Dau	MATa spc72::SPC72-Venus-TRP1 spc42::SPC42-mT2-LEU2 ade1 his2 leu2-3,112 trp1-1a ura3Dns arg4	2C, 4C-D, 2-fig sup 1 B; 2-fig sup 3B
KC20	15Dau	MATa kar1Δ15:HIS2 spc72::SPC72-Venus-TRP1 spc42::SPC42-mT2-LEU2 ade1 his2 leu2-3,112 trp1-1a ura3Dns arg4	2C, 2-fig sup 1B
KC26	15Dau	MATa spc72::SPC72-Venus-TRP1 nud1::NUD1-mT2-LEU2 ade1 his2 leu2-3,112 trp1-1a ura3Dns arg4	2D, 4-fig sup 1
KC28	15Dau	MATa kar1Δ15:HIS2 spc72::SPC72-Venus-TRP1 nud1::NUD1-mT2-LEU2 ade1 his2 leu2-3,112 trp1-1a ura3Dns arg4	2D
YKC22-20	15Dau	MATa spc72::SPC72-Venus-TRP1 spc98::SPC98-mT2-URA3 leu2::LEU2:PMET3-CDC20 ade1 his2 l trp1-1a ura3Dns arg4	3
YKC24-20	15Dau	MATa kar1Δ15:HIS2 spc72::SPC72-Venus:TRP1 spc98::SPC98-mT2:URA3 leu2::LEU2:PMET3-CDC20 ade1 his2 trp1-1a ura3Dns arg4	3
YZG701	15Dau	MATa spc72::SPC72-GFP-TRP1 spc42::SPC42-CFP-LEU2 ade1 his2 leu2-3,112 trp1-1a ura3Dns arg4	4A-B
YZG702	15Dau	MATa cdc28-4 spc72::SPC72-GFP-TRP1 spc42::SPC42-CFP-LEU2 ade1 his2 leu2-3,112 trp1-1a ura3Dns arg4	4A-B
YZG703	15Dau	MATa clb5::ARG4 spc72::SPC72-GFP-TRP1 spc42::SPC42-CFP-LEU2 ade1 his2 leu2-3,112 trp1-1a ura3Dns arg4	4A-B
YZG704	15Dau	MATa cdc28-4 clb5::ARG4 spc72::SPC72-GFP-TRP1 spc42::SPC42-CFP-LEU2 ade1 his2 leu2-3,112 trp1-1a ura3Dns arg4	4A-B
KC120	15Dau	MATa cdc28-4 spc72::SPC72-Venus-TRP1 spc42::SPC42-mT2-LEU2 ade1 his2 leu2-3,112 trp1-1a ura3Dns arg4	4C-D
KC124	15Dau	MATa clb5::ARG4 spc72::SPC72-Venus-TRP1 spc42::SPC42-mT2-LEU2 ade1 his2 leu2-3,112 trp1-1a ura3Dns arg4	4C-D
KC121	15Dau	MATa cdc28-4 clb5::ARG4 spc72::SPC72-Venus-TRP1 spc42::SPC42-mT2-LEU2 ade1 his2 leu2-3,112 trp1-1a ura3Dns arg4	4C-D, 5G
KC2141	15Dau	MATa cdc28-4 clb5::ARG4 kar1∆15:HIS2 spc72::SPC72-Venus-TRP1 spc42::SPC42-mT2-LEU2 ade1 his2 leu2-3,112 trp1-1a ura3Dns arg4	4F
KC18-U	15Dau	MATa spc72::SPC72-Venus-TRP1 spc42::SPC42-mT2-LEU2 ura3::URA3 ade1 his2 leu2-3,112 trp1-1a ura3Dns arg4	4G
KC20-U	15Dau	MATa kar1Δ15:HIS2 spc72::SPC72-Venus:TRP1 spc42::SPC42-mT2:LEU2 ura3::URA3 ade1 his2 leu2-3,112 trp1-1a ura3Dns arg4	4G
KC18-S1	15Dau	MATa SPC72-Venus:TRP1 SPC42-mT2:LEU2 ura3::URA3:PGAL1-SIC1∆N ade1 his2 leu2-3,112 trp1-1a arg4	4G
KC20-S1	15Dau	MATa kar1Δ15:HIS2 SPC72-Venus:TRP1 SPC42-mT2:LEU2 ura3::URA3:PGAL1-SIC1∆N ade1 his2 leu2-3,112 trp1-1a arg4	4G
YZG721	15Dau	MATa nud1::KANMX ura3::NUD1-CFP-URA3 spc72::SPC72-GFP-TRP1 ade1 his2 leu2-3,112 trp1-1a ura3Dns arg4	5A-B
YZG722	15Dau	MATa nud1::KANMX ura3::NUD17A-CFP-URA3 spc72::SPC72-GFP-TRP1 ade1 his2 leu2-3,112 trp1-1a ura3Dns arg4	5A-B
KC59	15Dau	MATa nud1::KANMX trp1::NUD1-HA3:TRP1 spc72::SPC72-Venus-LEU2 spc98::SPC98-mT2-URA3 ade1 his2 leu2-3,112 trp1-1a ura3Dns arg4	5C-F
KC61	15Dau	MATa nud1::KANMX trp1:: NUD17A-HA3:TRP1 spc72::SPC72-Venus-LEU2 spc98::SPC98-mT2-URA3 ade1 his2 leu2-3,112 trp1-1a ura3Dns arg4	5C-F
KC2001	15Dau	MATa nud1::KANMX ura3::NUD1-CFP-URA3 spc72::SPC72Venus-TRP1 ade1 his2 leu2-3,112 trp1-1a ura3Dns arg4	5G
KC2005	15Dau	MATa nud1::KANMX ura3::NUD17A-CFP-URA3 spc72::SPC72-Venus-TRP1 ade1 his2 leu2-3,112 trp1-1a ura3Dns arg4	5G
KC2018	15Dau	MATa tub4::TUB4-Venus-TRP1 nud1::NUD1-mT2-LEU2 ade1 his2 leu2-3,112 trp1-1a ura3Dns arg4	6A-B, 1-fig sup 3
KC2031	15Dau	MATa kar1∆15:HIS2 tub4::TUB4-Venus-TRP1 nud1::NUD1-mT2-LEU2 ade1 his2 leu2-3,112 trp1-1a ura3Dns arg4	6A-B
KC2125	15Dau	MATa cdc28-4 clb5::ARG4 tub4::TUB4-Venus-TRP1 nud1::NUD1-mT2-LEU2 ade1 his2 leu2-3,112 trp1-1a ura3Dns arg4	6A-B, 6-fig sup 1C
KC2134	15Dau	MATa cdc28-4 clb5::ARG4 kar1∆15:HIS2 tub4::TUB4-Venus-TRP1 nud1::NUD1-mT2-LEU2 ade1 his2 leu2-3,112 trp1-1a ura3Dns arg4	6A-B
KC2055	W303	MATa spc72::SPC72-Venus:LEU2 tub4::TUB4-mT2:TRP1 ura3-1 ade2-1 his3-11,15 leu2-3,112	1-fig sup 4
WT101	15Dau	MATa spc72::SPC72-GFP-URA3 spc42::SPC42-CFP-LEU2 ade1 his2 leu2-3,112 trp1-1a ura3Dns arg4	1-fig sup 5
WT102	W303	MATa spc72::SPC72-GFP-URA3 spc42::SPC42-CFP-LEU2 ura3-1 ade2-1 his3-11,15 leu2-3,112	1-fig sup 5
WT103	YEF473	MATa spc72::SPC72-GFP-URA3 spc42::SPC42-CFP-LEU2 trp1 leu2 ura3 his3 lys2	1-fig sup 5
WT104	BY4741	MATa spc72::SPC72-GFP-URA3 spc42::SPC42-CFP-LEU2 his3Δ1 leu2Δ0 met15Δ0 ura3Δ0	1-fig sup 5
KC54	15Dau	MATa nud1::NUD1-Venus-LEU2 spc42::SPC42-mT2-TRP1 ade1 his2 leu2-3,112 trp1-1a ura3Dns arg4	2-fig sup 1B, 2-fig sup 2
KC56	15Dau	MATa kar1Δ15:HIS2 nud1::NUD1-Venus-LEU2 spc42::SPC42-mT2-TRP1 ade1 his2 leu2-3,112 trp1-1a ura3Dns arg4	2-fig sup 1B, 2-fig sup 2
KC2039	15Dau	MATa spc42::SPC42-mT2-LEU2 kar1::Venus-KAR1-URA3 ade1 his2 leu2-3,112 trp1-1a ura3Dns arg4	2-fig sup 1B, 2-fig sup 3C
KC2043	15Dau	MATa spc42::SPC42-mT2-LEU2 kar1::Venus-kar1∆15-URA3 ade1 his2 leu2-3,112 trp1-1a ura3Dns arg4	2-fig sup 3C
KC2041	15Dau	MATa tub4::TUB4-mT2-TRP1 kar1:Venus-KAR1-URA3 ade1 his2 leu2-3,112 trp1-1a ura3Dns arg4	2-fig sup 3D
KC2045	15Dau	MATa tub4::TUB4-mT2-TRP1 kar1::Venus-kar1∆15-URA3 ade1 his2 leu2-3,112 trp1-1a ura3Dns arg4	2-fig sup 3D
KCS103	W303	MATa kar1::YFP-KAR1 spc72::SPC72-mT2-URA3 spc42::SPC42-mCherry-LEU2 ura3 trp1 leu2 his3 ade2 lys2	2-fig sup 3E
KCS104	W303	MATa kar1::YFP-KAR1 tub4::TUB4-mT2-TRP1 spc42::SPC42-mCherry-LEU2 ura3 trp1 leu2 his3 ade2 lys2	2-fig sup 3E
KC115	15Dau	MATa cdc28-4 spc72::SPC72-Venus-TRP1 nud1::NUD1-mT2-LEU2 ade1 his2 leu2-3,112 trp1-1a ura3Dns arg4	4-fig sup 1
KC119	15Dau	MATa clb5::ARG4 spc72::SPC72-Venus-TRP1 nud1::NUD1-mT2-LEU2 ade1 his2 leu2-3,112 trp1-1a ura3Dns arg4	4-fig sup 1
KC116	15Dau	MATa cdc28-4 clb5::ARG4 spc72::SPC72-Venus-TRP1 nud1::NUD1-mT2-LEU2 ade1 his2 leu2-3,112 trp1-1a ura3Dns arg4	4-fig sup 1
KC106	15Dau	MATa clb3∆ clb4∆ spc72::SPC72-Venus-TRP1 nud1::NUD1-mT2-LEU2 ade1 his2 leu2-3,112 trp1-1a ura3Dns arg4	4-fig sup 1
KC301	15Dau	MATa cdc28-4 clb3∆ clb4∆ spc72::SPC72-Venus-TRP1 nud1::NUD1-mT2-LEU2 ade1 his2 leu2-3,112 trp1-1a ura3Dns arg4	4-fig sup 1
MS19-65	15Dau	MATa nud1::KANMX trp1::NUD1-HA3-TRP1 ade1 his2 leu2-3,112 ura3Dns arg4	5-fig sup 1A
MS19-69	15Dau	MATa nud1::KANMX trp1::nud17A-HA3-TRP1 ade1 his2 leu2-3,112 ura3Dns arg4	5-fig sup 1A
MS14-56	15Dau	MATa bar1::LEU2 nud1::KANMX trp1::NUD1-HA3-TRP1 cdc5::PMET3-CDC5 ade1 his2 leu2-3,112 ura3Dns arg4	5-fig sup 1C
MS14-58	15Dau	MATa bar1::LEU2 nud1::KANMX trp1::nud17A-HA3-TRP1 cdc5::PMET3-CDC5 ade1 his2 leu2-3,112 ura3Dns arg4	5-fig sup 1C
MGY813	MGY70	[pMG2-PGAL1-MBP-PGAL10-MOB1-TRP1] mob1::KANMX	5, 5-fig sup 1D
MGY969f	MGY70	[pMG1-PGAL1-GST-PGAL10-MOB1-TRP1] mob1::KANMX	5, 5-fig sup 1D
MGY739	MGY70	[pMG1-PGAL1-GST-NUD1-TRP1-PGAL10-MOB1] mob1::KANMX	5, 5-fig sup 1D
MGY740	MGY70	[pMG1-PGAL1-GST-NUD17A-TRP1-PGAL10-MOB1], mob1::KANMX	5, 5-fig sup 1D
QPY386	MGY835	MATα [pMG3-PGAL1-MBP-SPC72-HIS3], cdc28Δ::LEU2	5, 5-fig sup 1D
QPY156	MGY70	MATa [pMG1-PGAL1-GST-NUD1(1-450)-TRP1] mob1::KANMX	5, 5-fig sup 1D
QPY157	MGY70	MATa [pMG1-PGAL1-GST-NUD1(405-851)-TRP1], mob1::KANMX	5, 5-fig sup 1D
QPY163	MGY70	MATa [pMG1-PGAL1-GST-NUD1(250-600)4A-TRP1], mob1::KANMX	5, 5-fig sup 1D
QPY296	MGY70	MATa [pMG1-PGAL1-GST-NUD1(250-600)-TRP1], mob1::KANMX	5, 5-fig sup 1D
QPY275	MGY70	MATa [pMG1-PGAL1-GST-NUD1Δ(250-600)-TRP1], mob1::KANMX	5, 5-fig sup 1D
QPY279	MGY70	MATa [pMG1-PGAL1-GST-NUD1(1-600)-TRP1], mob1::KANMX	5, 5-fig sup 1D
QPY288	MGY70	MATa [pMG1-PGAL1-GST-NUD1(600-851)-TRP1], mob1::KANMX	5, 5-fig sup 1D
MGY974	MGY139	[pMG6-PGAL1-FLAG-CLB5∆db-TwinStreptag-TRP1], [pMH940- PGAL1-6His-CKS1-HIS3-PGAL10-CDC28], mob1::KANMX, cdc28::LEU2	5, 5-fig sup 1
MGY975	MGY139	[pMG6-PGAL1-FLAG-CLN2∆Ct-TwinStreptag-TRP1], [pMH940- PGAL1-6His-CKS1-HIS3-PGAL10-CDC28], mob1:KANMX, cdc28::LEU2	5, 5-fig sup 1
MGY1025	MGY139	[pMG6-PGAL1- FLAG-CLB5∆db-TwinStreptag-TRP1], [pMH940- PGAL1-6His-CKS1-PGAL10-CDC28as-HIS3], mob1::KANMX cdc28::LEU2	5, 5-fig sup 1
KC2129	15Dau	MATa cdc28-4 clb5::ARG4 kar1∆15:HIS2 tub4::TUB4-mT2-URA3 spc72::SPC72-Venus-TRP1 ade1 his2 leu2-3,112 trp1-1a ura3Dns arg4	6-fig sup 1D
KC2138	15Dau	MATa cdc28-4 clb5::ARG4 tub4::TUB4-Venus-TRP1 spc42::SPC42-mT2-LEU2 ade1 his2 leu2-3,112 trp1-1a ura3Dns arg4	6-fig sup 1A-B
KC2003	15Dau	MATa nud1::KANMX ura3::NUD1-CFP-URA3 tub4::TUB4-Venus-TRP1 ade1 his2 leu2-3,112 trp1-1a ura3Dns arg4	6-fig sup 2A
KC2007	15Dau	MATa nud1::KANMX ura3::NUD17A-CFP-URA3 tub4::TUB4-Venus-TRP1 ade1 his2 leu2-3,112 trp1-1a ura3Dns arg4	6-fig sup 2A-B
